# Supplementary material for: Reduction-responsive modification-induced higher efficiency for attenuation of tumor metastasis of low molecular weight heparin functionalized liposomes
Source: Royal Society of Chemistry journal article supplement (doi:10.1039/c5ra27227k), 2016-01-01
Supplement: c5ra27227k1.pdf [file c5ra27227k1.pdf]

## SUPPORTING INFORMATION

### **Reduction responsive modification induced higher efficiency for attenuation of tumor metastasis of low molecular weight heparin functionalized liposomes**

Jilai Tian<sup>1,2</sup>, Miaomiao Han<sup>1</sup>, Yue Wang<sup>1</sup>, Kang Qian<sup>1</sup>, Xue Ke<sup>1,\*</sup>, Tianyuan Ci<sup>1,\*</sup>

<sup>1</sup> *Department of Pharmaceutics, State Key Laboratory of Natural Medicines, China  
Pharmaceutical University, 24 Tongjiaxiang, Nanjing 210009, China*

<sup>2</sup> *State Key Laboratory of Bioelectronics, Jiangsu Key Laboratory for Biomaterials  
and Devices, School of Biological Sciences & Medical Engineering, Southeast  
University, Nanjing 210096, China*

---

\* Corresponding authors. Tel: +86-25-8327-1035; Fax: +86-25-8327-1269;

E-mail address: [kexue1973@vip.sina.com](mailto:kexue1973@vip.sina.com) (X. Ke); [citianyuan\\_cpu@163.com](mailto:citianyuan_cpu@163.com) (T.Y. Ci)

## 1. $^1\text{H-NMR}$ of the synthesized conjugate of LMWH-DTSP-OSu

$^1\text{H-NMR}$  of LMWH, LMWH-eda and LMWH-DTSP-OSu was shown in Fig. S1.

The formation of LMWH-eda was confirmed with characteristic peak of  $\delta$  (ppm) 3.00 (m, 2H,  $\text{CH}_2\text{N}(\text{H}_2)$ , **a**). The formation of LMWH-DTSP-OSu was confirmed with characteristic peak of  $\delta$  (ppm) 2.72 (s, 4H, Su, **b**), 2.92 (t, 4H,  $2\text{CH}_2\text{S}$ , **c**).

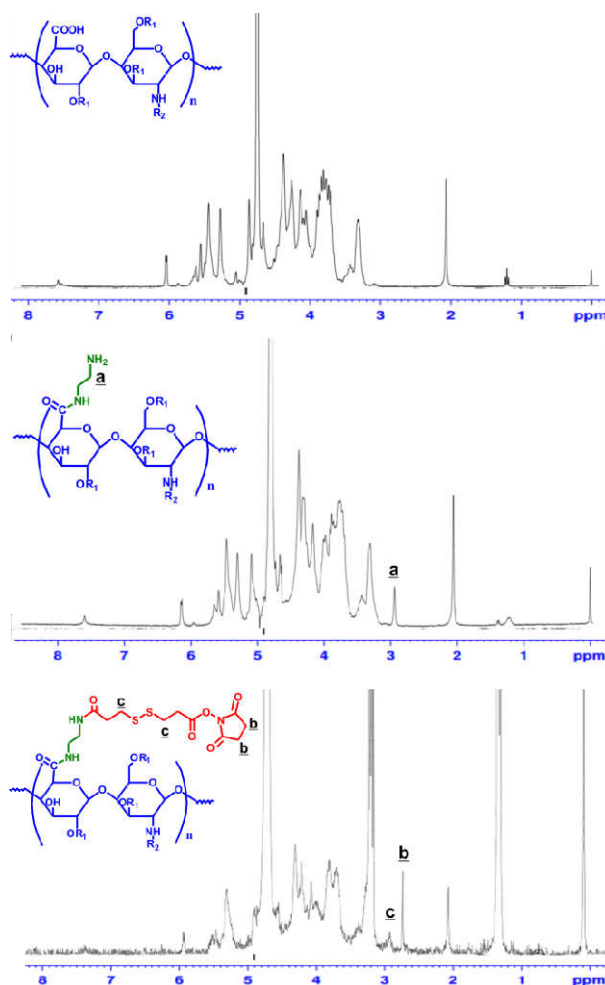

Fig. S1  $^1\text{H-NMR}$  of LMWH, LMWH-eda and LMWH-DTSP-OSu

## 2. Binding efficiency of LMWH

The binding efficiency of LMWH was evaluated with toluidine blue assay. As shown in Table. S1, the binding efficiency was all above 80 %, indicating the high modification efficacy. Along with the increase of feeding LMWH concentration,

ranging 0.5 to 2 mg/mL, the binding efficiency slightly decreased from ~ 90 % to ~ 80 %.

Table S1. Binding efficiency of LMWH with different feeding amount ( $n = 5$ )

| Concentration of LMWH (mg/mL) | Concentration of LMWH on liposome (mg/mL) | Bonding efficiency of LMWH (%) |
|-------------------------------|-------------------------------------------|--------------------------------|
| LMWH-DOX-Lip                  |                                           |                                |
| 0.5                           | 0.47 ± 0.01                               | 93.20 ± 2.59                   |
| 1.0                           | 0.90 ± 0.03                               | 89.90 ± 3.44                   |
| 1.5                           | 1.28 ± 0.04                               | 85.60 ± 2.40                   |
| 2.0                           | 1.61 ± 0.03                               | 80.60 ± 1.50                   |
| LMWH-ss-DOX-Lip               |                                           |                                |
| 0.5                           | 0.46 ± 0.01                               | 91.20 ± 2.59                   |
| 1.0                           | 0.90 ± 0.01                               | 89.90 ± 0.74                   |
| 1.5                           | 1.27 ± 0.04                               | 84.87 ± 2.72                   |
| 2.0                           | 1.60 ± 0.06                               | 80.30 ± 2.91                   |

### 3. Activated partial thromboplastin time (APTT)

APTT assay was conducted to evaluate the blood plasma coagulation time. Briefly, 90  $\mu$ L plasma mixed with 10  $\mu$ L heparin, LMWH or LMWH-DTP-OSu solutions with LMWH concentrations of 2, 4, 6, 8 and 100  $\mu$ g/mL. After equilibrating at 37  $^{\circ}$ C for 1 min and 7 min, 100  $\mu$ L APTT reagent and 100  $\mu$ L CaCl<sub>2</sub> (25 mM) were added respectively. Then record the plasma coagulation time. As shown in Table. S2, after chemical modification, the plasma coagulation time for LMWH-DTP-OSu was shorter than that of LMWH with same LMWH concentration, indicating chemical modification could lower the bleeding risk of LMWH.

Table S2. APTT assay for heparin, LMWH and LMWH-DTP-OSu

| Concentration<br>( $\mu\text{g/mL}$ ) | APTT (s) |         |      |              |
|---------------------------------------|----------|---------|------|--------------|
|                                       | Control  | heparin | LMWH | LMWH-DTP-OSu |
| 2                                     | 35.6     | 85.6    | 38.8 | 36.3         |
| 4                                     | 35.6     | >120    | 43.4 | 37.1         |
| 6                                     | 35.6     | -       | 50.6 | 37.8         |
| 8                                     | 35.6     | -       | 59.5 | 38.4         |
| 100                                   | 35.6     | -       | >120 | 60.2         |

#### 4. Blood routine examination

The C57BL/6 mice (healthy) were administrated with saline, DOX-sol, DOX-Lip, LMWH-DOX-Lip and LMWH-ss-DOX-Lip at a dose of 3.5 mg/kg DOX every third day. After 21 days, blood samples were collected for blood analysis.

As presented in Fig. S2, after intravenous injection of DOX-Lip, LMWH-DOX-Lip and LMWH-ss-DOX-Lip, white blood cell numbers, red blood cell numbers, blood platelet numbers and hemoglobin contents showed no significant difference compared with Saline group, indicating little blood toxicity.

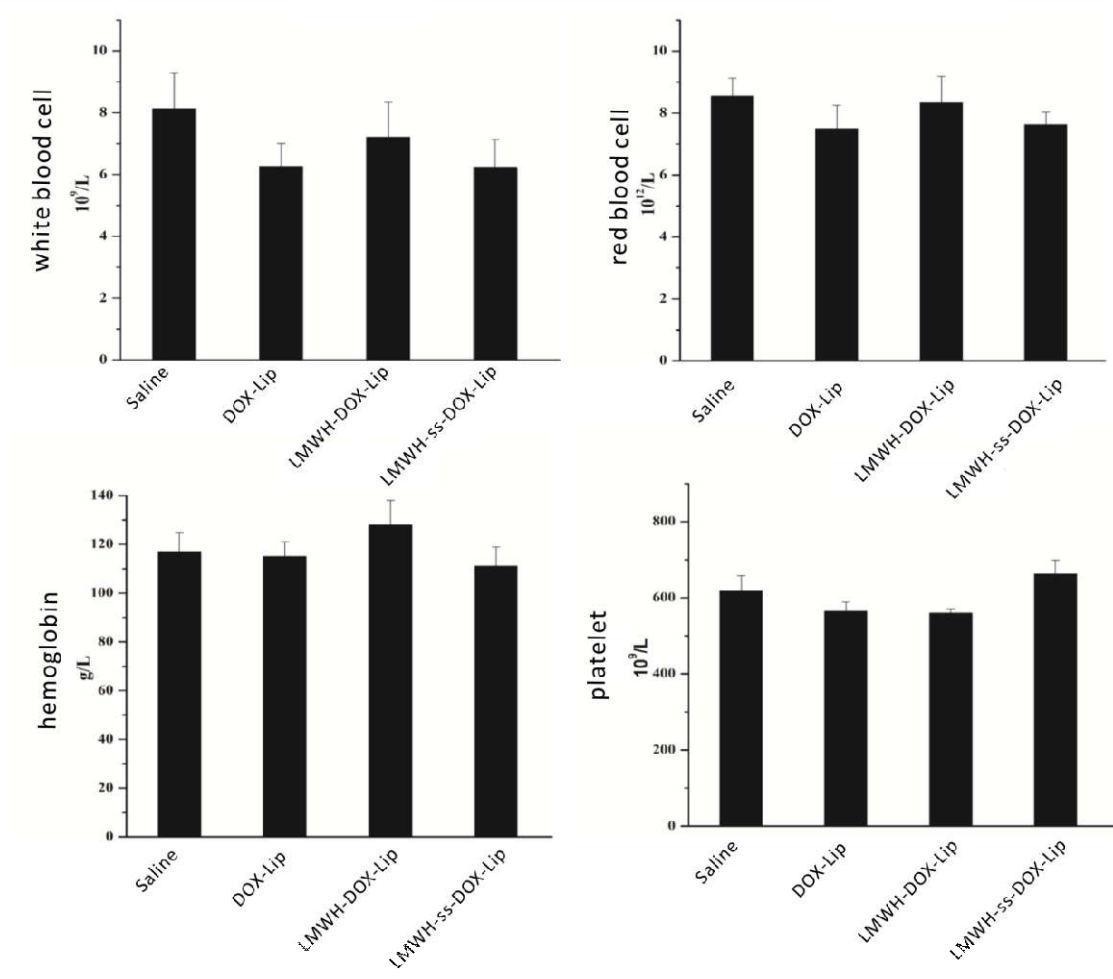

Fig. S2 Blood routine examination of white blood cell number, red blood cell number, blood platelet number and hemoglobin content of indicated groups.
